# Supplementary material for: 3D genome of multiple myeloma reveals spatial genome disorganization associated with copy number variations
Source: PubMed Central journal article supplement (PMC5715138; doi:10.1038/s41467-017-01793-w), 2017-12-05
Supplement: 41467_2017_1793_MOESM3_ESM.pdf [file 41467_2017_1793_MOESM3_ESM.pdf]

## **Description of Additional Supplementary Files**

**File Name: Supplementary Data 1**

Description: Translocation Events.

**File Name: Supplementary Data 2**

Description: Gene lists associated with translocation events.
